# Supplementary material for: Winter Production of Asian Leafy Greens in High Tunnels Using Biodegradable Mulches
Source: MDPI journal article supplement (doi:10.3390/horticulturae7110454), 2021-11-03
Supplement: s1 [file s1]

# Supplementary Materials: Winter Production of Asian Leafy Greens in High Tunnels Using Biodegradable Mulches

Tongyin Li \*, Geoffrey T. Lalk, Qianwen Zhang, Zhiheng Xing and Guihong Bi

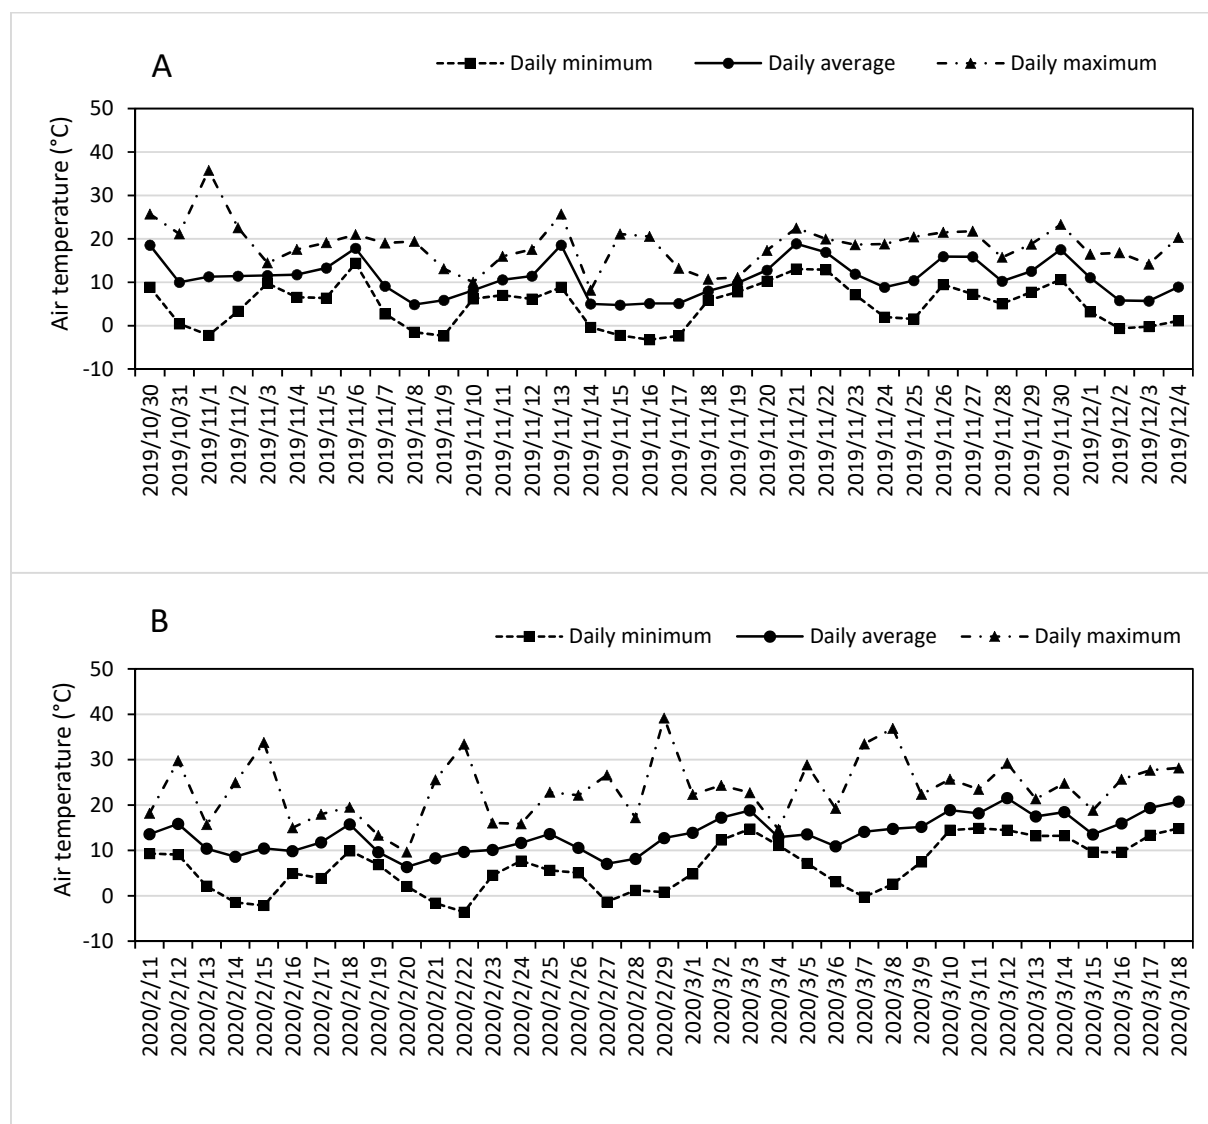

**Figure S1.** Daily maximum, average, and air minimum temperatures in the high tunnel within the two experiment durations from Oct. 30 to Dec. 4 2019 (A) and from Feb. 11 to Mar. 18 2020 (B) in Starkville, Mississippi. Air temperatures in the high tunnel were recorded by a temperature and relative humidity sensor (HOBO S-THB-M002; Onset Computer Corp., Bourne, MA, USA) at one-hour intervals connected to a data logger (HOBO Micro Station H21-002; Onset Computer Corp., Bourne, MA, USA).

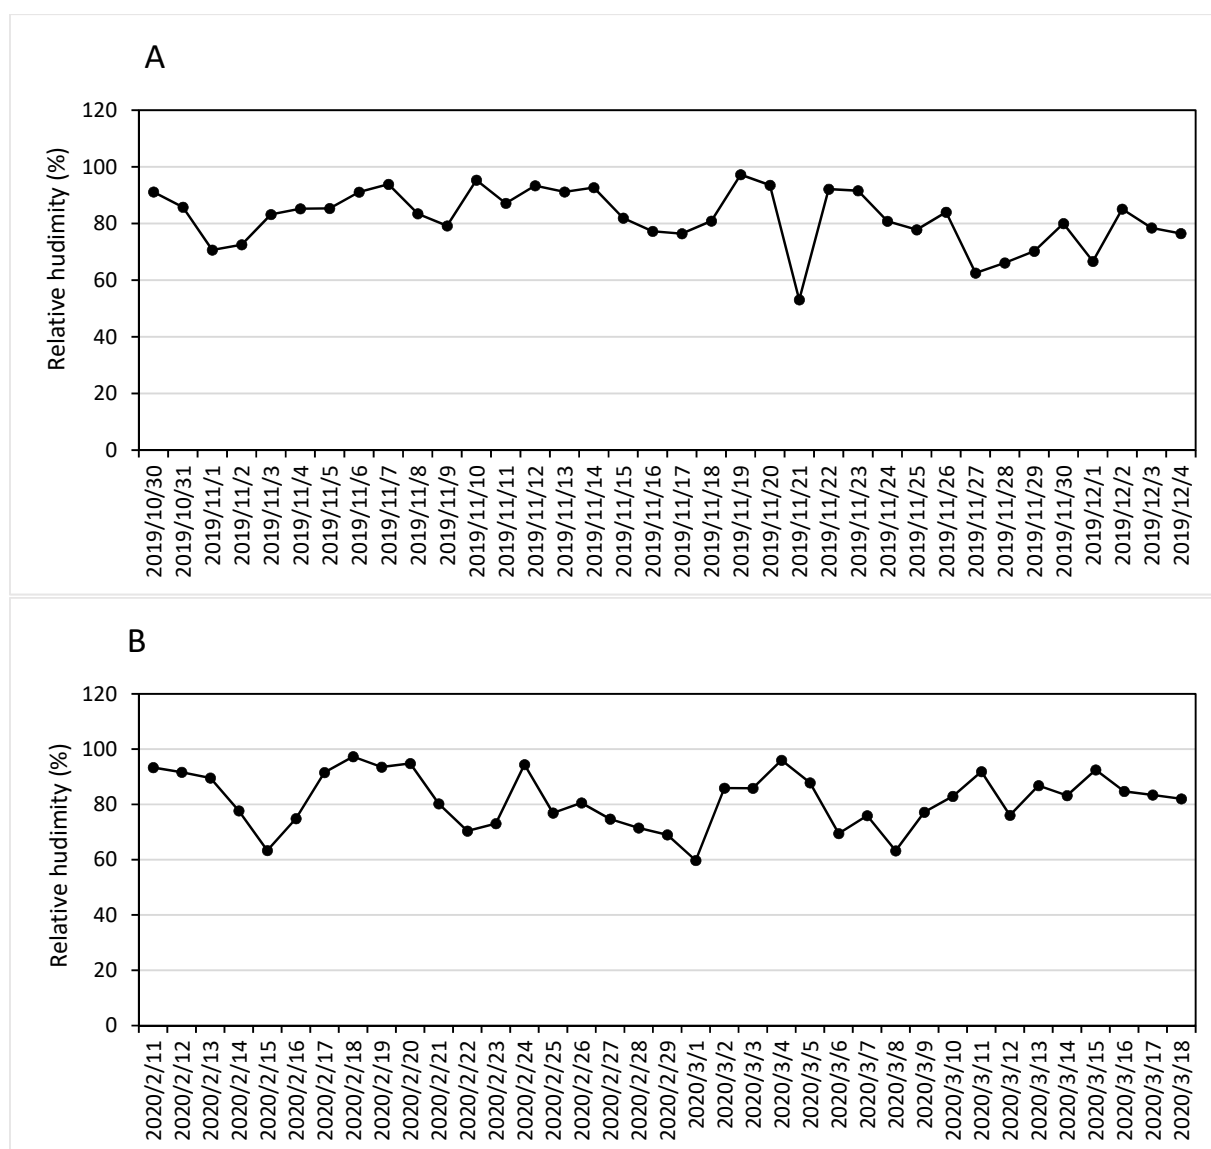

**Figure S2.** Daily average relative humidity in the high tunnel within the two experiment durations from Oct. 30 to Dec. 4 2019 (A) and from Feb. 11 to Mar. 18 2020 (B) in Starkville, Mississippi. Relative humidity in the high tunnel was recorded by a temperature and relative humidity sensor (HOBO S-THB-M002; Onset Computer Corp., Bourne, MA, USA) at one-hour intervals connected to a data logger (HOBO Micro Station H21-002; Onset Computer Corp., Bourne, MA, USA).

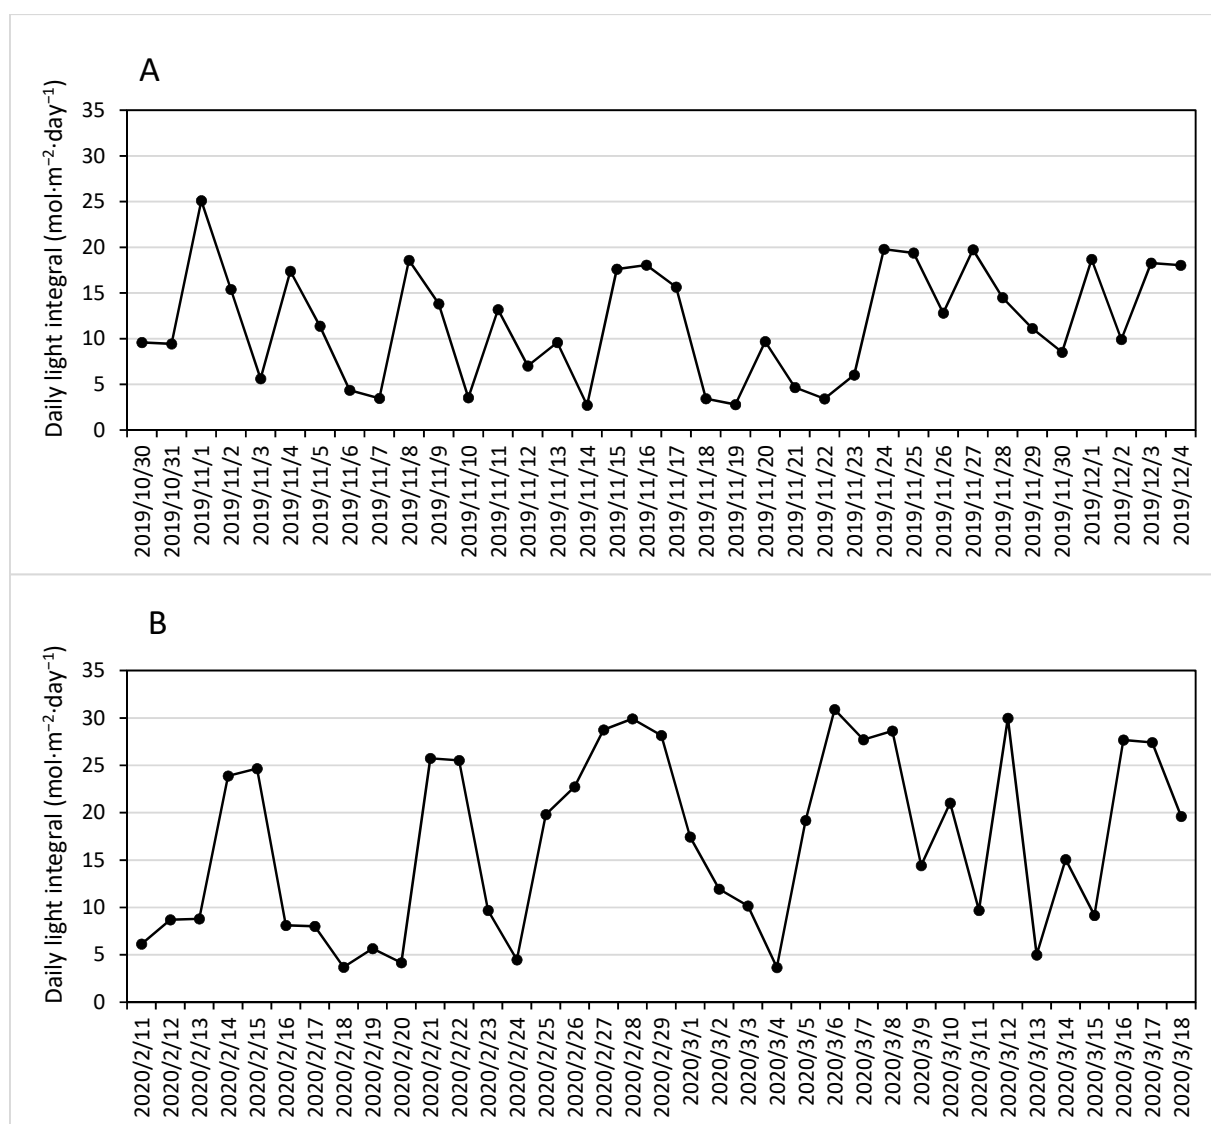

**Figure S3.** Daily light integral in the high tunnel within the two experiment durations from Oct. 4 2019 (A) and from Feb. 11 to Mar. 18 2020 (B) in Starkville, Mississippi. Daily light integral in the high tunnel was calculated by averaging photosynthetically active radiation (*PAR*) readings during a day and multiplying 0.0864. *PAR* was recorded by a quantum sensor (HOBO S-LIA-M003; Onset Computer Corp., Bourne, MA, USA) at one-hour intervals connected to a data logger (HOBO Micro Station H21-002; Onset Computer Corp., Bourne, MA, USA).
